# Supplementary material
Source: PubMed Central journal article supplement (PMC6141204)
Supplement: NIHMS939566-supplement-1.pdf [file NIHMS939566-supplement-1.pdf]

Midlife Self-Reported Social Support as a Buffer Against Premature Mortality Risks Associated with  
Childhood Abuse

Jessica J. Chiang, Ph.D.<sup>a\*</sup>

Edith Chen, Ph.D.<sup>a,b</sup>

Gregory E. Miller, Ph.D.<sup>a,b</sup>

<sup>a</sup>Institute for Policy Research, Northwestern University

<sup>b</sup>Department of Psychology, Northwestern University

Address correspondence to Jessica J. Chiang, Ph.D., Institute for Policy Research, Northwestern University, Evanston, IL 60208. E-mail: [jessica.chiang@northwestern.edu](mailto:jessica.chiang@northwestern.edu)

### Supplementary Results

Supplementary Table 1. *Results of models predicting mortality risk from childhood abuse, social support, and their interactions with positive affect included as a covariate.*

|                  | Severe Physical Abuse |         | Moderate Physical Abuse |         | Emotional Abuse   |         |
|------------------|-----------------------|---------|-------------------------|---------|-------------------|---------|
|                  | HR (95% CI)           | p       | HR (95% CI)             | p       | HR (95% CI)       | p       |
| Age              | 2.49 (1.98, 3.14)     | < 0.001 | 2.43 (1.94, 3.05)       | < 0.001 | 2.42 (1.93, 3.03) | < 0.001 |
| Age x Time       | 1.15 (1.04, 1.27)     | 0.006   | 1.16 (1.05, 1.28)       | 0.003   | 1.16 (1.05, 1.28) | 0.003   |
| Female           | 0.81 (0.71, 0.93)     | 0.003   | 0.80 (0.70, 0.92)       | 0.001   | 0.81 (0.71, 0.93) | 0.002   |
| African American | 1.69 (1.29, 2.21)     | < 0.001 | 1.67 (1.27, 2.18)       | < 0.001 | 1.73 (1.33, 2.26) | < 0.001 |
| Other            | 0.90 (0.61, 1.34)     | 0.600   | 0.94 (0.63, 1.39)       | 0.759   | 0.93 (0.62, 1.38) | 0.705   |
| Education        | 0.85 (0.80, 0.91)     | < 0.001 | 0.85 (0.80, 0.90)       | < 0.001 | 0.84 (0.79, 0.90) | < 0.001 |
| Heart disease    | 1.88 (1.63, 2.16)     | < 0.001 | 1.86 (1.62, 2.14)       | < 0.001 | 1.87 (1.62, 2.15) | < 0.001 |
| Cancer           | 2.87 (1.82, 4.53)     | < 0.001 | 2.86 (1.82, 4.50)       | < 0.001 | 2.87 (1.83, 4.51) | < 0.001 |
| Cancer x Time    | 0.69 (0.56, 0.84)     | < 0.001 | 0.69 (0.56, 0.84)       | < 0.001 | 0.69 (0.56, 0.85) | < 0.001 |
| Depression       | 1.14 (0.92, 1.40)     | 0.230   | 1.14 (0.92, 1.40)       | 0.230   | 1.14 (0.93, 1.41) | 0.204   |
| Smoking          | 1.74 (1.52, 2.00)     | < 0.001 | 1.73 (1.51, 1.99)       | < 0.001 | 1.73 (1.51, 1.99) | < 0.001 |

|                        |                   |       |                   |       |                   |       |
|------------------------|-------------------|-------|-------------------|-------|-------------------|-------|
| Alcohol use            | 1.04 (0.91, 1.19) | 0.542 | 1.04 (0.91, 1.19) | 0.543 | 1.04 (0.91, 1.19) | 0.590 |
| Positive affect        | 0.95 (0.89, 1.02) | 0.160 | 0.95 (0.88, 1.02) | 0.126 | 0.94 (0.88, 1.01) | 0.104 |
| Abuse                  | 1.01 (0.83, 1.24) | 0.908 | 0.95 (0.82, 1.10) | 0.495 | 0.92 (0.80, 1.06) | 0.240 |
| Social support         | 0.94 (0.87, 1.0)  | 0.055 | 0.93 (0.87, 1.01) | 0.081 | 0.93 (0.86, 1.01) | 0.079 |
| Abuse x Social support | 0.81 (0.70, 0.94) | 0.004 | 0.89 (0.78, 1.00) | 0.050 | 0.89 (0.79, 1.00) | 0.057 |

Note. Gender was coded as 0 = male and 1 = female. Race was dummy-coded with European-Americans as the reference group.

Supplementary Table 2. Results of models predicting mortality risk from childhood abuse, social support, and their interactions with sense of control included as a covariate.

|                  | Severe Physical Abuse |         | Moderate Physical Abuse |         | Emotional Abuse   |         |
|------------------|-----------------------|---------|-------------------------|---------|-------------------|---------|
|                  | HR (95% CI)           | p       | HR (95% CI)             | p       | HR (95% CI)       | p       |
| Age              | 2.43 (1.93, 3.06)     | < 0.001 | 2.37 (1.89, 2.97)       | < 0.001 | 2.36 (1.88, 2.95) | < 0.001 |
| Age x Time       | 1.16 (1.05, 1.27)     | 0.004   | 1.17 (1.06, 1.29)       | 0.002   | 1.17 (1.06, 1.28) | 0.002   |
| Female           | 0.81 (0.71, 0.92)     | 0.002   | 0.80 (0.70, 0.91)       | 0.001   | 0.81 (0.71, 0.92) | 0.002   |
| African American | 1.65 (1.26, 2.15)     | < 0.001 | 1.62 (1.24, 2.12)       | < 0.001 | 1.68 (1.29, 2.20) | < 0.001 |
| Other            | 0.89 (0.60, 1.32)     | 0.570   | 0.93 (0.63, 1.38)       | 0.727   | 0.91 (0.61, 1.36) | 0.658   |
| Education        | 0.86 (0.80, 0.91)     | < 0.001 | 0.85 (0.80, 0.91)       | < 0.001 | 0.85 (0.79, 0.90) | < 0.001 |
| Heart disease    | 1.90 (1.65, 2.18)     | < 0.001 | 1.89 (1.64, 2.17)       | < 0.001 | 1.89 (1.65, 2.17) | < 0.001 |
| Cancer           | 2.97 (1.88, 4.67)     | < 0.001 | 2.95 (1.88, 4.64)       | < 0.001 | 2.96 (1.89, 4.65) | < 0.001 |
| Cancer x Time    | 0.68 (0.55, 0.83)     | < 0.001 | 0.68 (0.55, 0.83)       | < 0.001 | 0.68 (0.56, 0.83) | < 0.001 |
| Depression       | 1.14 (0.93, 1.40)     | 0.200   | 1.14 (0.93, 1.40)       | 0.195   | 1.15 (0.94, 1.41) | 0.168   |
| Smoking          | 1.76 (1.53, 2.02)     | < 0.001 | 1.75 (1.52, 2.01)       | < 0.001 | 1.75 (1.52, 2.01) | < 0.001 |
| Alcohol use      | 1.03 (0.98, 1.18)     | 0.633   | 1.03 (0.90, 1.18)       | 0.631   | 1.03 (0.90, 1.18) | 0.688   |

|                        |                   |       |                   |       |                   |       |
|------------------------|-------------------|-------|-------------------|-------|-------------------|-------|
| Sense of control       | 0.93 (0.87, 0.99) | 0.023 | 0.93 (0.87, 0.99) | 0.023 | 0.93 (0.87, 0.99) | 0.024 |
| Abuse                  | 1.02 (0.83, 1.25) | 0.842 | 0.96 (0.83, 1.11) | 0.565 | 0.94 (0.82, 1.08) | 0.377 |
| Social support         | 0.94 (0.88, 1.01) | 0.087 | 0.94 (0.87, 1.01) | 0.104 | 0.94 (0.87, 1.02) | 0.115 |
| Abuse x Social support | 0.81 (0.70, 0.94) | 0.006 | 0.89 (0.79, 1.01) | 0.068 | 0.89 (0.79, 1.00) | 0.057 |

Note. Gender was coded as 0 = male and 1 = female. Race was dummy-coded with European-Americans as the reference group.

Supplementary Table 3. Results of models predicting mortality risk from childhood abuse, social support, and their interactions with purpose of life included as a covariate.

|                  | Severe Physical Abuse |         | Moderate Physical Abuse |         | Emotional Abuse   |         |
|------------------|-----------------------|---------|-------------------------|---------|-------------------|---------|
|                  | HR (95% CI)           | p       | HR (95% CI)             | p       | HR (95% CI)       | p       |
| Age              | 2.42 (1.92, 3.04)     | < 0.001 | 2.39 (1.90, 3.00)       | < 0.001 | 2.37 (1.89, 2.98) | < 0.001 |
| Age x Time       | 1.15 (1.04, 1.27)     | 0.005   | 1.16 (1.05, 1.28)       | 0.003   | 1.16 (1.05, 1.27) | 0.003   |
| Female           | 0.81 (0.71, 0.93)     | 0.002   | 0.80 (0.70, 0.91)       | 0.001   | 0.81 (0.71, 0.93) | 0.002   |
| African American | 1.65 (1.27, 2.15)     | < 0.001 | 1.63 (1.24, 2.12)       | < 0.001 | 1.69 (1.30, 2.20) | < 0.001 |
| Other            | 0.88 (0.60, 1.30)     | 0.513   | 0.91 (0.62, 1.35)       | 0.649   | 0.89 (0.60, 1.33) | 0.570   |
| Education        | 0.87 (0.82, 0.93)     | < 0.001 | 0.87 (0.81, 0.92)       | < 0.001 | 0.86 (0.81, 0.92) | < 0.001 |
| Heart disease    | 1.89 (1.64, 2.17)     | < 0.001 | 1.88 (1.63, 2.16)       | < 0.001 | 1.89 (1.63, 2.16) | < 0.001 |
| Cancer           | 2.98 (1.89, 4.69)     | < 0.001 | 3.04 (1.92, 4.79)       | < 0.001 | 2.90 (1.93, 4.78) | < 0.001 |
| Cancer x Time    | 0.68 (0.56, 0.83)     | < 0.001 | 0.67 (0.55, 0.82)       | < 0.001 | 0.67 (0.55, 0.83) | < 0.001 |
| Depression       | 1.15 (0.94, 1.41)     | 0.170   | 1.15 (0.94, 1.41)       | 0.172   | 1.16 (0.95, 1.41) | 0.152   |
| Smoking          | 1.75 (1.52, 2.01)     | < 0.001 | 1.75 (1.52, 2.00)       | < 0.001 | 1.74 (1.52, 2.00) | < 0.001 |
| Alcohol use      | 1.03 (0.90, 1.18)     | 0.693   | 1.03 (0.90, 1.18)       | 0.678   | 1.02 (0.89, 1.17) | 0.735   |

|                        |                   |         |                   |         |                   |         |
|------------------------|-------------------|---------|-------------------|---------|-------------------|---------|
| Purpose in life        | 0.89 (0.84, 0.95) | < 0.001 | 0.89 (0.83, 0.94) | < 0.001 | 0.89 (0.83, 0.94) | < 0.001 |
| Abuse                  | 0.99 (0.80, 1.21) | 0.888   | 0.93 (0.81, 1.08) | 0.346   | 0.93 (0.81, 1.07) | 0.290   |
| Social support         | 0.94 (0.88, 1.01) | 0.085   | 0.94 (0.85, 1.01) | 0.112   | 0.94 (0.87, 1.01) | 0.106   |
| Abuse x Social support | 0.80 (0.69, 0.93) | 0.003   | 0.89 (0.78, 1.00) | 0.051   | 0.89 (0.79, 1.00) | 0.054   |

Note. Gender was coded as 0 = male and 1 = female. Race was dummy-coded with European-Americans as the reference group.

Supplementary Table 4. Results of models predicting mortality risk from childhood abuse, positive affect, and their interactions.

|                  | Severe Physical Abuse |         | Moderate Physical Abuse |         | Emotional Abuse   |         |
|------------------|-----------------------|---------|-------------------------|---------|-------------------|---------|
|                  | HR (95% CI)           | p       | HR (95% CI)             | p       | HR (95% CI)       | p       |
| Age              | 2.49 (1.98, 3.13)     | < 0.001 | 2.43 (1.94, 3.05)       | < 0.001 | 2.41 (1.92, 3.02) | < 0.001 |
| Age x Time       | 1.15 (1.04, 1.27)     | 0.006   | 1.16 (1.05, 1.28)       | 0.003   | 1.16 (1.05, 1.28) | 0.003   |
| Female           | 0.80 (0.70, 0.92)     | 0.001   | 0.80 (0.70, 0.91)       | 0.001   | 0.80 (0.70, 0.91) | 0.001   |
| African American | 1.69 (1.29, 2.21)     | < 0.001 | 1.68 (1.28, 2.20)       | < 0.001 | 1.73 (1.33, 2.26) | < 0.001 |
| Other            | 0.93 (0.62, 1.38)     | 0.704   | 0.97 (0.66, 1.44)       | 0.883   | 0.95 (0.64, 1.42) | 0.799   |
| Education        | 0.85 (0.80, 0.91)     | < 0.001 | 0.85 (0.80, 0.90)       | < 0.001 | 0.84 (0.79, 0.90) | < 0.001 |
| Heart disease    | 1.86 (1.62, 2.14)     | < 0.001 | 1.85 (1.61, 2.13)       | < 0.001 | 1.85 (1.61, 2.13) | < 0.001 |
| Cancer           | 2.80 (1.78, 4.43)     | < 0.001 | 2.80 (1.78, 4.41)       | < 0.001 | 2.84 (1.81, 4.46) | < 0.001 |
| Cancer x Time    | 0.69 (0.56, 0.85)     | < 0.001 | 0.69 (0.56, 0.85)       | < 0.001 | 0.69 (0.57, 0.85) | < 0.001 |
| Depression       | 1.16 (0.94, 1.43)     | 0.161   | 1.15 (0.93, 1.42)       | 0.184   | 1.17 (0.97, 1.43) | 0.147   |
| Smoking          | 1.74 (1.51, 1.99)     | < 0.001 | 1.73 (1.50, 1.98)       | < 0.001 | 1.72 (1.50, 1.98) | < 0.001 |
| Alcohol use      | 1.06 (0.93, 1.21)     | 0.373   | 1.06 (0.93, 1.21)       | 0.388   | 1.06 (0.92, 1.21) | 0.430   |
| Abuse            | 1.15 (0.95, 1.38)     | 0.154   | 0.98 (0.85, 1.13)       | 0.809   | 0.94 (0.82, 1.08) | 0.387   |

|                         |                   |       |                   |       |                   |       |
|-------------------------|-------------------|-------|-------------------|-------|-------------------|-------|
| Positive affect         | 0.92 (0.85, 0.99) | 0.018 | 0.91 (0.84, 0.99) | 0.021 | 0.92 (0.85, 1.00) | 0.046 |
| Abuse x Positive affect | 1.02 (0.87, 1.20) | 0.764 | 1.01 (0.88, 1.15) | 0.915 | 0.97 (0.85, 1.10) | 0.624 |

Note. Gender was coded as 0 = male and 1 = female. Race was dummy-coded with European-Americans as the reference group.

Supplementary Table 5. Results of models predicting mortality risk from childhood abuse, sense of control, and their interactions.

|                  | Severe Physical Abuse |         | Moderate Physical Abuse |         | Emotional Abuse   |         |
|------------------|-----------------------|---------|-------------------------|---------|-------------------|---------|
|                  | HR (95% CI)           | p       | HR (95% CI)             | p       | HR (95% CI)       | p       |
| Age              | 2.41 (1.91, 3.03)     | < 0.001 | 2.35 (1.88, 2.94)       | < 0.001 | 2.33 (1.86, 2.92) | < 0.001 |
| Age x Time       | 1.15 (1.03, 1.27)     | 0.004   | 1.17 (1.06, 1.28)       | 0.002   | 1.16 (1.06, 1.28) | 0.002   |
| Female           | 0.80 (0.70, 0.91)     | 0.001   | 0.79 (0.69, 0.90)       | 0.001   | 0.79 (0.69, 0.91) | 0.001   |
| African American | 1.63(1.25, 2.13)      | < 0.001 | 1.61 (1.23, 2.11)       | < 0.001 | 1.67 (1.28, 2.18) | < 0.001 |
| Other            | 0.91 (0.61, 1.35)     | 0.640   | 0.95 (0.64, 1.41)       | 0.793   | 0.93 (0.62, 1.39) | 0.723   |
| Education        | 0.86 (0.81, 0.92)     | < 0.001 | 0.86 (0.80, 0.91)       | < 0.001 | 0.85 (0.80, 0.91) | < 0.001 |
| Heart disease    | 1.89 (1.64, 2.17)     | < 0.001 | 1.88 (1.63, 2.16)       | < 0.001 | 1.89 (1.64, 2.17) | < 0.001 |
| Cancer           | 2.91 (1.85, 4.58)     | < 0.001 | 2.91 (1.85, 4.57)       | < 0.001 | 2.93 (1.87, 4.60) | < 0.001 |
| Cancer x Time    | 0.69 (0.55, 0.83)     | < 0.001 | 0.68 (0.56, 0.83)       | < 0.001 | 0.68 (0.56, 0.84) | < 0.001 |
| Depression       | 1.18 (0.96, 1.44)     | 0.117   | 1.17 (0.95, 1.43)       | 0.141   | 1.18 (0.97, 1.45) | 0.100   |
| Smoking          | 1.76 (1.53, 2.02)     | < 0.001 | 1.75 (1.53, 2.01)       | < 0.001 | 1.75 (1.52, 2.01) | < 0.001 |
| Alcohol use      | 1.06 (0.92, 1.21)     | 0.430   | 1.05 (0.92, 1.20)       | 0.445   | 1.05 (0.92, 1.20) | 0.494   |
| Abuse            | 1.15 (0.94, 1.39)     | 0.168   | 0.98 (0.85, 1.14)       | 0.792   | 0.95 (0.83, 1.10) | 0.521   |

|                          |                   |       |                   |       |                   |       |
|--------------------------|-------------------|-------|-------------------|-------|-------------------|-------|
| Sense of control         | 0.90 (0.84, 0.96) | 0.002 | 0.91 (0.84, 0.97) | 0.007 | 0.91 (0.85, 0.98) | 0.017 |
| Abuse x Sense of control | 0.99 (0.84, 1.18) | 0.925 | 0.96 (0.84, 1.09) | 0.539 | 0.94 (0.84, 1.07) | 0.364 |

Note. Gender was coded as 0 = male and 1 = female. Race was dummy-coded with European-Americans as the reference group.

Supplementary Table 6. Results of models predicting mortality risk from childhood abuse, purpose in life, and their interactions.

|                  | Severe Physical Abuse |         | Moderate Physical Abuse |         | Emotional Abuse   |         |
|------------------|-----------------------|---------|-------------------------|---------|-------------------|---------|
|                  | HR (95% CI)           | p       | HR (95% CI)             | p       | HR (95% CI)       | p       |
| Age              | 2.39 (1.90, 3.01)     | < 0.001 | 2.35 (1.87, 2.96)       | < 0.001 | 2.34 (1.86, 2.95) | < 0.001 |
| Age x Time       | 1.15 (1.05, 1.27)     | 0.004   | 1.16 (1.05, 1.28)       | 0.003   | 1.16 (1.05, 1.27) | 0.004   |
| Female           | 0.80 (0.70, 0.91)     | 0.001   | 0.79 (0.69, 0.90)       | < 0.001 | 0.80 (0.70, 0.91) | 0.001   |
| African American | 1.64 (1.26, 2.14)     | < 0.001 | 1.63 (1.25, 2.13)       | < 0.001 | 1.68 (1.29, 2.18) | < 0.001 |
| Other            | 0.90 (0.61, 1.34)     | 0.614   | 0.96 (0.65, 1.43)       | 0.85    | 0.91 (0.61, 1.36) | 0.645   |
| Education        | 0.87 (0.82, 0.93)     | < 0.001 | 0.87 (0.81, 0.92)       | < 0.001 | 0.87 (0.81, 0.92) | < 0.001 |
| Heart disease    | 1.87 (1.63, 2.15)     | < 0.001 | 1.88 (1.63, 2.16)       | < 0.001 | 1.87 (1.63, 2.15) | < 0.001 |
| Cancer           | 2.92 (1.86, 4.61)     | < 0.001 | 2.98 (1.89, 4.69)       | < 0.001 | 3.01 (1.91, 4.74) | < 0.001 |
| Cancer x Time    | 0.68 (0.55, 0.83)     | < 0.001 | 0.67 (0.54, 0.83)       | < 0.001 | 0.68 (0.55, 0.83) | < 0.001 |
| Depression       | 1.19 (0.98, 1.46)     | 0.080   | 1.20 (0.99, 0.47)       | 0.070   | 1.21 (0.99, 1.48) | 0.059   |
| Smoking          | 1.75 (1.53, 2.01)     | < 0.001 | 1.75 (1.53, 2.01)       | < .001  | 1.74 (1.51, 2.00) | < 0.001 |
| Alcohol use      | 1.04 (0.91, 1.19)     | 0.521   | 1.04 (0.91, 1.19)       | 0.550   | 1.04 (0.91, 1.19) | 0.571   |
| Abuse            | 1.21 (0.99, 1.47)     | 0.059   | 1.02 (0.88, 1.19)       | 0.775   | 0.97 (0.84, 1.12) | 0.686   |

|                         |                   |         |                   |         |                   |         |
|-------------------------|-------------------|---------|-------------------|---------|-------------------|---------|
| Purpose in life         | 0.86 (0.80, 0.91) | < 0.001 | 0.83 (0.78, 0.89) | < 0.001 | 0.86 (0.80, 0.92) | < 0.001 |
| Abuse x Purpose in life | 1.18 (1.00, 1.40) | 0.047   | 1.17 (1.03, 1.32) | 0.018   | 1.04 (0.92, 1.17) | 0.580   |

Note. Gender was coded as 0 = male and 1 = female. Race was dummy-coded with European-Americans as the reference group.

Supplementary Table 7. Results of models predicting mortality risk from interactions between physical abuse and purpose in life and between physical abuse and social support.

|                         | Severe Physical Abuse |         | Moderate Physical Abuse |         |
|-------------------------|-----------------------|---------|-------------------------|---------|
|                         | HR (95% CI)           | p       | HR (95% CI)             | p       |
| Age                     | 2.42 (1.92, 3.04)     | < 0.001 | 2.38 (1.89, 2.99)       | < 0.001 |
| Age x Time              | 1.15 (1.05, 1.27)     | 0.004   | 1.16 (1.05, 1.28)       | 0.003   |
| Female                  | 0.81 (0.70, 0.92)     | 0.002   | 0.79 (0.69, 0.90)       | 0.001   |
| African American        | 1.66 (0.27, 0.16)     | < 0.001 | 1.64 (1.26, 2.14)       | < 0.001 |
| Other                   | 0.88 (0.59, 1.31)     | 0.525   | 0.94 (0.63, 1.39)       | 0.761   |
| Education               | 0.87 (0.81, 0.92)     | < 0.001 | 0.86 (0.81, 0.92)       | < 0.001 |
| Heart disease           | 1.89 (1.64, 2.17)     | < 0.001 | 1.89 (1.64, 2.17)       | < 0.001 |
| Cancer                  | 2.99 (1.90, 4.70)     | < 0.001 | 3.03 (1.92, 4.78)       | < 0.001 |
| Cancer x Time           | 0.68 (0.55, 0.83)     | < 0.001 | 0.67 (0.55, 0.83)       | < 0.001 |
| Depression              | 1.15 (0.94, 1.40)     | 0.182   | 1.17 (0.95, 1.43)       | 0.134   |
| Smoking                 | 1.75 (1.53, 2.01)     | < 0.001 | 1.75 (1.53, 2.01)       | < 0.001 |
| Alcohol use             | 1.02 (0.90, 1.17)     | 0.722   | 1.02 (0.89, 1.17)       | 0.731   |
| Abuse                   | 1.08 (0.87, 1.34)     | 0.476   | 1.00(0.86, 1.16)        | 0.967   |
| Purpose in life         | 0.87 (0.81, 0.92)     | < 0.001 | 0.84 (0.78, 0.90)       | < 0.001 |
| Abuse x Purpose in life | 1.23(1.04, 1.46)      | 0.019   | 1.21 (1.06, 1.38)       | 0.004   |
| Social support          | 0.95 (0.88, 1.01)     | 0.123   | 0.95 (0.88, 1.03)       | 0.204   |
| Abuse x Social support  | 0.78 (0.67, 0.90)     | 0.001   | 0.85 (0.75, 0.97)       | 0.012   |

Note. Gender was coded as 0 = male and 1 = female. Race was dummy-coded with European-Americans as the reference group.
